# Supplementary material for: Essentiality of mmpL3 and impact of its silencing on Mycobacterium tuberculosis gene expression
Source: PubMed Central journal article supplement (PMC5327466; doi:10.1038/srep43495), 2017-02-27
Supplement: srep43495-s1.pdf [file srep43495-s1.pdf]

# **Essentiality of *mmpL3* and impact of its silencing on *Mycobacterium tuberculosis* gene expression**

**Giulia Degiacomi<sup>1</sup>, Andrej Benjak<sup>2</sup>, Jan Madacki<sup>3</sup>, Francesca Boldrin<sup>1</sup>, Roberta Provvedi<sup>4</sup>, Giorgio Palù<sup>1</sup>, Jana Kordulakova<sup>3</sup>, Stewart T. Cole<sup>2</sup>, Riccardo Manganelli\*<sup>1</sup>**

<sup>1</sup>Department of Molecular Medicine, University of Padova, Padova, Italy; <sup>2</sup>Global Health Institute, Ecole Polytechnique Fédérale de Lausanne, Lausanne, Switzerland; <sup>3</sup>Department of Biochemistry, Faculty of Natural Sciences, Comenius University in Bratislava, Bratislava, Slovakia; <sup>4</sup>Department of Biology of Padova, Padova, Italy.

| <b>Table S1. Oligonucleotides used for qRT-PCR</b> |                       |                    |
|----------------------------------------------------|-----------------------|--------------------|
| <b>Name</b>                                        | <b>Sequence 5'→3'</b> | <b>Target gene</b> |
| RP1843                                             | cgggatcagcgagaagtact  | <i>mmpL3</i>       |
| RP1844                                             | gttgtccggctcgatgaatc  |                    |
| RP1516                                             | ccatcccgaaaaggaagacc  | <i>sigA</i>        |
| RP1517                                             | aggtctggttcagcgtcgag  |                    |
| RP1825                                             | tcgttcggatgctggagtc   | <i>csaR</i>        |
| RP1826                                             | caatgagctcttcgatggcc  |                    |
| RP1827                                             | gctcaaacagggcaagagtc  | <i>iniA</i>        |
| RP1828                                             | catcgggtgctgatgcatcg  |                    |
| RP1833                                             | ttcgggatggaacggttctc  | <i>nuoB</i>        |
| RP1834                                             | agatgtcgaccggaacaaca  |                    |
| RP1835                                             | gcggacatcaattacgtgct  | <i>atpB</i>        |
| RP1836                                             | cgatcagtgcgaccagaatg  |                    |
| RP1837                                             | caagtgggatctagcggta   | <i>kasA</i>        |
| RP1838                                             | cgcattcatcaggtcgtagc  |                    |

**Table S2. Validation of RNA-seq data with qRT-PCR**

| <b>Gene</b> | <b>Gene name</b> | <b>FoldChange Rna-seq</b> | <b>FoldChange qRT-PCR</b> |
|-------------|------------------|---------------------------|---------------------------|
| Rv0967      | <i>csoR</i>      | 7.12                      | 3.37 ± 0.90               |
| Rv0342      | <i>iniA</i>      | 5.38                      | 9.2 ± 1.54                |
| Rv3146      | <i>nuoB</i>      | 0.29                      | 0.51 ± 0.25               |
| Rv1304      | <i>atpB</i>      | 0.32                      | 0.21 ± 0.02               |
| Rv2245      | <i>kasA</i>      | 0.33                      | 0.53 ± 0.2                |
